# Supplementary material
Source: Research Square preprint supplement (doi:10.21203/rs.3.rs-9855124/v1)
Supplement: Supplementary file 1 [file cedb79b8175a26e92e4aeded.xlsx]

## Sheet: Political Risk Index 
VaA	CoC	PSAV	RQ	GME	Political Index
1	0.375815	0.967765	0.112323	1	0.610763
0.817194	0.363214	0.870989	0.130608	0.935058	0.563572
0.573453	0.377141	0.774212	0.10884	0.344955	0.333375
0.451582	0.375815	0.967765	0.0870721	0.364801	0.331277
0.475956	0.375815	0.774212	0.0435361	0.315603	0.289662
0.0859704	0	0.387106	0	0.221965	0.110642		vaa	0.358825		0.128755
0.329712	0	0.387106	0.174144	0.159425	0.180156		coc	-0.383491		0.147065
0.207841	0	0.580659	0.21768	0.14808	0.190109		psav	0.276129		0.0762472
0.0859704	0.596883	0.580659	0.286816	0.221968	0.308493		rq	-0.576463		0.33231
0.837668	0.596883	0.580659	0.304752	0.425053	0.475337		gme	0.561803		0.315623
0.695323	0.81795	0.387106	0.32652	0.586886	0.533075
0.670949	0.596883	0.193553	0.391825	0.64843	0.523793
0.573453	0.81795	0.387106	0.348288	0.610921	0.532203
0.329712	0.596883	0.387106	0.435361	0.541172	0.475229
0.354086	0.375815	0.193553	0.439714	0.549516	0.435179
0.329712	0	0.656145	0.439496	0.548593	0.411678
0.458686	0.0103065	0.947202	0.428242	0.43479	0.412334
0.693374	0.58605	0.637564	0.48312	0.263629	0.467828
0.834676	0.423525	0.71219	0.534349	0.173407	0.456358
0.6573	0.613905	0	0.526743	0.188761	0.409534
0.774582	0.373446	0.29952	0.64138	0.167359	0.443449
0.621226	0.641759	0.600402	0.570366	0.149644	0.456915
0.301884	0.660367	1	0.61117	0.15452	0.464101
0.456445	0.360221	0.792434	0.666673	0.128065	0.434129
0.427571	0.271393	0.72492	0.649388	0.0677927	0.387433
0.409755	0.418122	0.827921	0.658514	0.0722738	0.419018
0.595813	0.537734	0.350118	0.682162	0.0517309	0.425508
0.539841	0.709626	0.540571	0.682522	0	0.441894
0.485394	0.907064	0.562371	0.802056	0.0381706	0.517352
0.385511	0.963685	0.208586	0.808075	0.0722955	0.498615
0.304551	1	0.0779221	0.828047	0.0172153	0.472821
0.319308	0.959259	0.67066	0.813058	0.0268674	0.511989
0.526784	0.491142	0.718687	0.884487	0.000200165	0.488841
0.643362	0.490989	0.667374	0.867624	0.140104	0.538469
0.670098	0.636595	0.13155	1	0.0331442	0.532701
0.393598	0.495196	0.771532	0.977855	0.00984249	0.510388
0.373724	0.234513	0.799736	0.959307	0.107185	0.496202
0.302096	0.347537	0.718334	0.940026	0.0817135	0.482948
0.155732	0.4073	0.520077	0.936557	0.057043	0.448836
0.217857	0.467058	0.405059	0.924645	0.0294435	0.444184
0.0989453	0.963081	0.547055	0.997251	0.0593203	0.546206
0	0.96729	0.495127	0.987049	0.0774336	0.532453

## Sheet: EconomicRiskIndex 
GDPG	ICPI	IGDPD	CAB	GDPPCG	Economic Risk Index
0.18637	1	1	0.160066	0.129094	0.460968
0.841423	0.337933	0.42309	0.0347792	0.805091	0.594942
0.825593	0.264703	0.349674	0.487235	0.800433	0.599507
0.615511	0.12463	0.333933	0.590214	0.598334	0.457984
0.792779	0.167898	0.298191	0.432318	0.774649	0.549591
0.885472	0.151298	0.32522	0.540711	0.879928	0.613303
1	0.0294995	0.31872	1	1	0.686692		weights
0.965036	0.00271883	0.498432	0.851242	0.964827	0.671477		GDPG	0.26977	0.0727759
0.878769	0.210456	0.423918	0.546307	0.878858	0.637953		ICPI	0.234222	0.05486
0.783196	0.294861	0.429836	0.440527	0.777153	0.594748		IGDPD	0.126227	0.0159332
0.895014	0.314528	0.412795	0.453042	0.894481	0.662276		CAB	0.080893	0.00654368
0.781976	0.158566	0.338619	0.648961	0.762096	0.563493		GDPPCG	0.288888	0.0834563
0.867321	0.101887	0.220748	0.677866	0.838941	0.5829
0.808542	0.243117	0.362713	0.536916	0.784621	0.590948
0.769679	0.166318	0.264829	0.351594	0.735471	0.52093
0.775907	0.135204	0.222504	0.650988	0.765526	0.542882
0.829323	0.147746	0.281234	0.716538	0.813117	0.586694
0.833416	0.154535	0.21213	0.571737	0.807117	0.567219
0.849212	0.153992	0.279821	0.682018	0.832222	0.596071
0.707014	0.156357	0.265434	0.534944	0.677035	0.499719
0.936759	0.0912066	0.149286	0.638414	0.925059	0.611798
0.737278	0.119818	0.252949	0.977602	0.728917	0.548545
0.666093	0.144581	0.252481	0.935915	0.659897	0.511771
0.843193	0.0845172	0.230585	0.758251	0.840695	0.580574
0.777644	0.103494	0.275482	0.59301	0.777567	0.541399
0.672774	0.108947	0.169054	0.428161	0.671162	0.456877
0.799647	0.204546	0.429673	0.247632	0.807337	0.571128
0.835041	0.202473	0.329217	0.411554	0.844303	0.59145
0.821069	0.224231	0.232918	0.189167	0.834095	0.559682
0.735945	0.0507391	0	0.318927	0.750479	0.453023
0.779583	0.0607471	0.0654068	0.174801	0.79677	0.47711
0.767271	0.147061	0.140159	0	0.787487	0.486619
0.743383	0.0828609	0.114596	0.323082	0.757643	0.479425
0.737807	0.0754352	0.175895	0.372559	0.754382	0.486979
0.756976	0.067607	0.103678	0.413879	0.775922	0.490766
0.751371	0.0211785	0.0754389	0.504233	0.772271	0.481069
0.758435	0.0137525	0.111624	0.482776	0.782387	0.48699
0.761537	0.0784092	0.0841436	0.454595	0.784649	0.497876
0.764362	0.0675676	0.0855719	0.489403	0.789147	0.500394
0.71854	0	0.00691248	0.428938	0.742702	0.443969
0	0.0522949	0.118454	0.237828	0	0.0464393
0.751908	0.0871012	0.146099	0.0151148	0.777549	0.467532

## Sheet: FinancialRiskIndex
DSEG	EoG	TRI	OER	EDS	Financial Risk Index
0.0487284	0.00413296	0.134823	0	0.213107	0.0757149
0.257008	0.000269162	0.021447	0.0368224	0.303341	0.126814
0.305501	0.000111018	0.0488568	0.0937507	0.383944	0.171707
0.462608	0.000100015	0	0.118264	0.334479	0.184305
0.516916	0	0.00234939	0.179842	0.361606	0.215273
0.475869	0.00401795	0.01055	0.228129	0.414899	0.236588
0.229445	0.0226972	0.16331	0.170022	0.292228	0.173705
0.122423	0.0427192	0.321646	0.152727	0.266292	0.167545	weights
0.222187	0.0534924	0.325997	0.16918	0.229948	0.180728	DSEG		0.1513	0.0228917
0.103453	0.0560872	0.373851	0.222463	0.209685	0.176773	EoG		0.239963	0.0575822
0.071686	0.07571	0.44001	0.211104	0.185676	0.174494	TRI		0.102082	0.0104208
0.0849141	0.0808675	0.554536	0.234299	0.176857	0.193125	OER		0.255197	0.0651254
0.084786	0.089159	0.466156	0.231679	0.11595	0.17009	EDS		0.251458	0.0632312
0.0139733	0.0872169	0.411811	0.292983	0.0983023	0.164569
0.0385093	0.0914388	0.362305	0.302168	0.137302	0.176391
0.0777589	0.112938	0.398865	0.285288	0.182906	0.198381
0.0150671	0.136864	0.354317	0.301806	0.146927	0.185257
0.0539499	0.121242	0.271944	0.393232	0.14886	0.2028
0.0618861	0.126814	0.208871	0.479547	0.135445	0.217554
0.00834426	0.128824	0.272797	0.514632	0.123828	0.222493
0.297657	0.129019	0.369654	0.545911	0.0229266	0.25881
0	0.144201	0.347833	0.630589	0	0.231035
0.0510237	0.150436	0.512149	0.655076	0.259475	0.32852
0.482412	0.162094	0.605487	0.594486	0.411448	0.428867
0.318939	0.178523	0.527429	0.582637	0.355587	0.383038
0.391814	0.202327	0.356399	0.64138	0.414749	0.412185
0.695575	0.230661	0.27358	0.706419	0.341965	0.454784
0.657329	0.283505	0.349179	0.694821	0.544957	0.517479
0.457847	0.312645	0.272655	0.610699	0.5045	0.454837
0.985095	0.246241	0.492082	0.713821	0.678093	0.611043
0.423631	0.577692	0.234097	0.679258	0.681083	0.571226
0.394546	0.386371	0.356671	0.618142	0.760126	0.537707
0.936485	0.449921	0.381465	0.657662	0.775884	0.651531
0.386634	0.701798	0.28833	0.676816	0.84663	0.64195
1	0.828387	0.283094	0.674472	0.820093	0.757323
0.722521	0.749865	0.361026	0.804885	0.694852	0.706242
0.186895	0.806527	0.396707	0.819152	0.669543	0.639717
0.298303	1	0.383306	0.787969	0.602765	0.676882
0.446605	0.821126	0.520264	0.771885	0.578339	0.660131
0.400677	0.891265	0.556574	0.817142	0.665937	0.707296
0.456422	0.663798	0.754192	0.931039	0.971093	0.78712
0.624178	0.545064	1	1	1	0.83397

## Sheet: Country Risk Index 
	Political Risk Index	Economic Risk Index	Financial Risk Index	Country Risk Index
1980	0.610763	0.460968	0.0757149	0.362608
1981	0.563572	0.594942	0.126814	0.419674
1982	0.333375	0.599507	0.171707	0.377299
1983	0.331277	0.457984	0.184305	0.327207
1984	0.289662	0.549591	0.215273	0.362367
1985	0.110642	0.613303	0.236588	0.347532						political	0.511133	0.261257
1986	0.180156	0.686692	0.173705	0.371273						economic	-0.617939	0.381849
1987	0.190109	0.671477	0.167545	0.365866						financial	0.597407	0.356895
1988	0.308493	0.637953	0.180728	0.388698
1989	0.475337	0.594748	0.176773	0.414379
1990	0.533075	0.662276	0.174494	0.454435
1991	0.523793	0.563493	0.193125	0.420939
1992	0.532203	0.5829	0.17009	0.422326
1993	0.475229	0.590948	0.164569	0.408544
1994	0.435179	0.52093	0.176391	0.375563
1995	0.411678	0.542882	0.198381	0.385654
1996	0.412334	0.586694	0.185257	0.397871
1997	0.467828	0.567219	0.2028	0.411194
1998	0.456358	0.596071	0.217554	0.424479
1999	0.409534	0.499719	0.222493	0.377217
2000	0.443449	0.611798	0.25881	0.441836
2001	0.456915	0.548545	0.231035	0.411289
2002	0.464101	0.511771	0.32852	0.433916
2003	0.434129	0.580574	0.428867	0.488171
2004	0.387433	0.541399	0.383038	0.444656
2005	0.419018	0.456877	0.412185	0.431036
2006	0.425508	0.571128	0.454784	0.491561
2007	0.441894	0.59145	0.517479	0.525978
2008	0.517352	0.559682	0.454837	0.511205
2009	0.498615	0.453023	0.611043	0.521331
2010	0.472821	0.47711	0.571226	0.509579
2011	0.511989	0.486619	0.537707	0.511481
2012	0.488841	0.479425	0.651531	0.543309
2013	0.538469	0.486979	0.64195	0.55574
2014	0.532701	0.490766	0.757323	0.596855
2015	0.510388	0.481069	0.706242	0.569092
2016	0.496202	0.48699	0.639717	0.543904
2017	0.482948	0.497876	0.676882	0.557863
2018	0.448836	0.500394	0.660131	0.543934
2019	0.444184	0.443969	0.707296	0.538006
2020	0.546206	0.0464393	0.78712	0.441352
2021	0.532453	0.467532	0.83397	0.615273

## Sheet: Raw Dataset
Year	FDI inflows % of GDP	FDI	Trade Openness (%)	Political Index	Economic Risk Index	Financial Risk Index	Country Risk Index	CRI	Population growth (annual %)	GDP per capita growth	Trade (% of GDP)	Inflation (%)
1980	0.103484	-2.26834	106.99	0.610763	0.460968	0.0757149	0.362608	-1.01443	1.68601	-0.116	112.591	26.5696
1981	0.0587717	-2.8341	94.86	0.563572	0.594942	0.126814	0.419674	-0.868277	1.48197	0.043	99.9118	10.8639
1982	0.162047	-1.81987	92.31	0.333375	0.599507	0.171707	0.377299	-0.974717	1.22243	0.042	97.1258	8.86524
1983	0.148868	-1.9047	89.01	0.331277	0.457984	0.184305	0.327207	-1.11716	0.919668	-0.005	93.6457	8.4367
1984	0.473538	-0.747524	95.7	0.289662	0.549591	0.215273	0.362367	-1.0151	1.04574	0.036	100.689	7.46367
1985	0.740161	-0.300887	103.55	0.110642	0.613303	0.236588	0.347532	-1.0569	0.817321	0.061	108.948	8.19952
1986	0.507614	-0.678034	108.7	0.180156	0.686692	0.173705	0.371273	-0.990816	0.764516	0.089	114.345	8.02256
1987	0.912394	-0.0916837	124.1	0.190109	0.671477	0.167545	0.365866	-1.00549	0.748099	0.081	127.075	12.915
1988	1.11216	0.106301	131.79	0.308493	0.637953	0.180728	0.388698	-0.944952	0.688401	0.061	134.411	10.8865
1989	1.64092	0.495258	133.03	0.475337	0.594748	0.176773	0.414379	-0.880975	0.765915	0.037	135.734	11.0476
1990	1.54665	0.436093	135.68	0.533075	0.662276	0.174494	0.454435	-0.788701	0.712313	0.064	137.112	10.5836
1991	0.608271	-0.497135	127.35	0.523793	0.563493	0.193125	0.420939	-0.865267	1.07946	0.033	128.354	8.56428
1992	0.456358	-0.784478	117.09	0.532203	0.5829	0.17009	0.422326	-0.861979	1.31574	0.051	121.852	5.3554
1993	0.451452	-0.795286	117.8	0.475229	0.590948	0.164569	0.408544	-0.895157	1.18554	0.038	122.524	9.22022
1994	0.561766	-0.576669	117.29	0.435179	0.52093	0.176391	0.375563	-0.979329	1.40006	0.027	122.183	6.55543
1995	0.462655	-0.770773	115.16	0.411678	0.542882	0.198381	0.385654	-0.952816	0.859933	0.034	119.739	5.4032
1996	0.829076	-0.187444	123.04	0.412334	0.586694	0.185257	0.397871	-0.921628	1.02276	0.045	127.858	7.00204
1997	1.32011	0.277713	122.98	0.467828	0.567219	0.2028	0.411194	-0.888691	1.2521	0.044	127.805	5.12077
1998	0.291879	-1.23142	127.22	0.456358	0.596071	0.217554	0.424479	-0.856892	1.05142	0.05	132.199	6.96358
1999	1.1362	0.127689	126.39	0.409534	0.499719	0.222493	0.377217	-0.974934	1.27125	0.013	130.691	6.57191
2000	5.6964	1.73983	118.29	0.443449	0.611798	0.25881	0.441836	-0.816815	0.982676	0.071	122.313	3.40993
2001	-0.599864	1.73983	125.51	0.456915	0.548545	0.231035	0.411289	-0.88846	0.790048	0.025	129.779	6.23201
2002	0.662488	-0.411752	115.88	0.464101	0.511771	0.32852	0.433916	-0.834904	0.69424	0.009	119.822	6.21928
2003	1.07676	0.0739611	106.5	0.434129	0.580574	0.428867	0.488171	-0.717089	0.723662	0.052	110.119	5.62319
2004	0.211203	-1.55493	104.9	0.387433	0.541399	0.383038	0.444656	-0.810454	0.627104	0.037	108.469	6.84545
2005	0.643838	-0.440308	119.19	0.419018	0.456877	0.412185	0.431036	-0.841564	0.5921	0.012	123.246	3.9481
2006	1.51886	0.417963	127.06	0.425508	0.571128	0.454784	0.491561	-0.710168	0.466404	0.044	127.063	11.0431
2007	4.18107	1.43057	120.88	0.441894	0.59145	0.517479	0.525978	-0.642496	0.455526	0.052	120.876	8.30832
2008	3.78089	1.32996	115.49	0.517352	0.559682	0.454837	0.511205	-0.670984	0.361631	0.05	115.489	5.68669
2009	2.81176	1.03381	104.43	0.498615	0.453023	0.611043	0.521331	-0.65137	0.265538	0.03	104.43	-0.654201
2010	4.29784	1.45811	113.46	0.472821	0.47711	0.571226	0.509579	-0.67417	0.237887	0.041	113.457	1.12642
2011	3.76207	1.32497	117.54	0.511989	0.486619	0.537707	0.511481	-0.670446	0.16014	0.039	117.539	3.16146
2012	5.04785	1.61896	119.5	0.488841	0.479425	0.651531	0.543309	-0.610077	0.277321	0.032	119.5	2.46552
2013	2.38648	0.869819	109.97	0.538469	0.486979	0.64195	0.55574	-0.587455	0.242166	0.031	113.306	4.13433
2014	3.48445	1.24831	113.29	0.532701	0.490766	0.757323	0.596855	-0.516081	0.181022	0.036	110.59	2.1683
2015	1.8027	0.589284	107.64	0.510388	0.481069	0.706242	0.569092	-0.563713	0.132404	0.036	107.146	1.39953
2016	3.00746	1.1011	97.99	0.496202	0.48699	0.639717	0.543904	-0.608982	0.0687082	0.038	101.366	2.38463
2017	3.50017	1.25281	97.37	0.482948	0.497876	0.676882	0.557863	-0.583642	0.0901673	0.038	101.25	1.63651
2018	3.12514	1.13948	95.11	0.448836	0.500394	0.660131	0.543934	-0.608927	0.0545355	0.04	98.0872	1.67539
2019	3.07611	1.12367	92.81	0.444184	0.443969	0.707296	0.538006	-0.619886	0.0322331	0.029	96.2889	-0.466017
2020	1.97059	0.678334	90.41	0.546206	0.0464393	0.78712	0.441352	-0.817912	0.00229068	-0.146	85.8837	2.57056
2021	2.20617	0.791256	89.47	0.532453	0.467532	0.83397	0.615273	-0.485689	0.025273	0.037	98.235	3.32317
